# Supplementary material for: Atomic layer deposition of HfNx films and improving the film performance by annealing under NH3 atmosphere
Source: Royal Society of Chemistry journal article supplement (doi:10.1039/d2tc03964h), 2022-12-16
Supplement: d2tc03964h1.pdf [file d2tc03964h1.pdf]

Electronic Supplementary Material (ESI) for Journal of Materials Chemistry C.  
This journal is © The Royal Society of Chemistry 2022

# Supporting Information

## **Atomic layer deposition of HfN<sub>x</sub> films and improving the film performance by annealing under NH<sub>3</sub> atmosphere**

*Seung Kyu Ryoo<sup>a</sup>, Beom Yong Kim<sup>a,b</sup>, Yong Bin Lee<sup>a</sup>, Hyeon Woo Park<sup>a</sup>, Suk Hyun Lee<sup>a</sup>,  
Minsik Oh<sup>a</sup>, In Soo Lee<sup>a</sup>, Seungyong Byun<sup>a</sup>, Doosup Shim<sup>a,b</sup>, Jae Hoon Lee<sup>a,b</sup>, Hani Kim<sup>a,b</sup>,  
Kyung Do Kim<sup>a</sup>, and Cheol Seong Hwang<sup>a,\*</sup>*

<sup>a</sup>Department of Materials Science and Engineering and Inter-University Semiconductor  
Research Center, Seoul National University, Seoul, 08826, South Korea

<sup>b</sup>SK Hynix Semiconductor, Inc., Icheon, Gyeonggi 17336, Republic of Korea

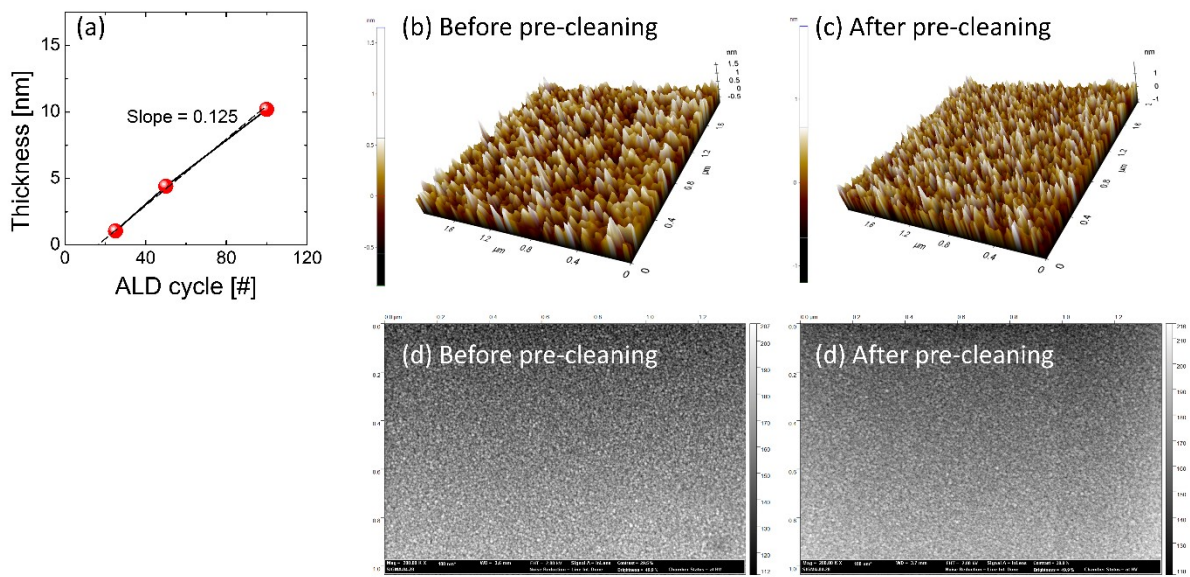

**Figure S1.** (a) Increasing thickness of HfN<sub>x</sub> film with ALD cycle deposited without precleaning step, AFM image of TiN (b) before and (c) after precleaning step. SEM image of TiN (d) before and after (e) precleaned TiN.

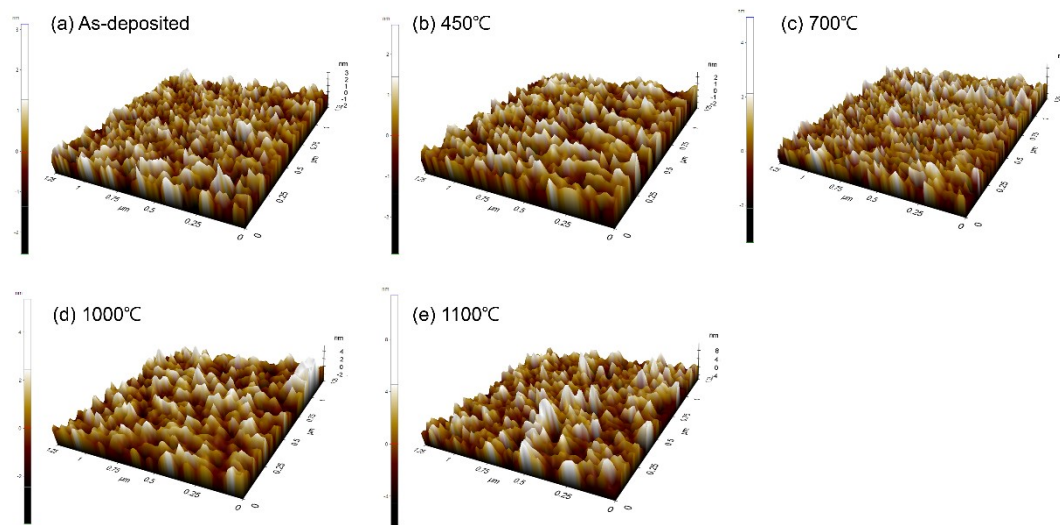

**Figure S2.** The AFM images of HfN<sub>x</sub> film, annealed under different temperatures. All films were deposited with the precleaning step.

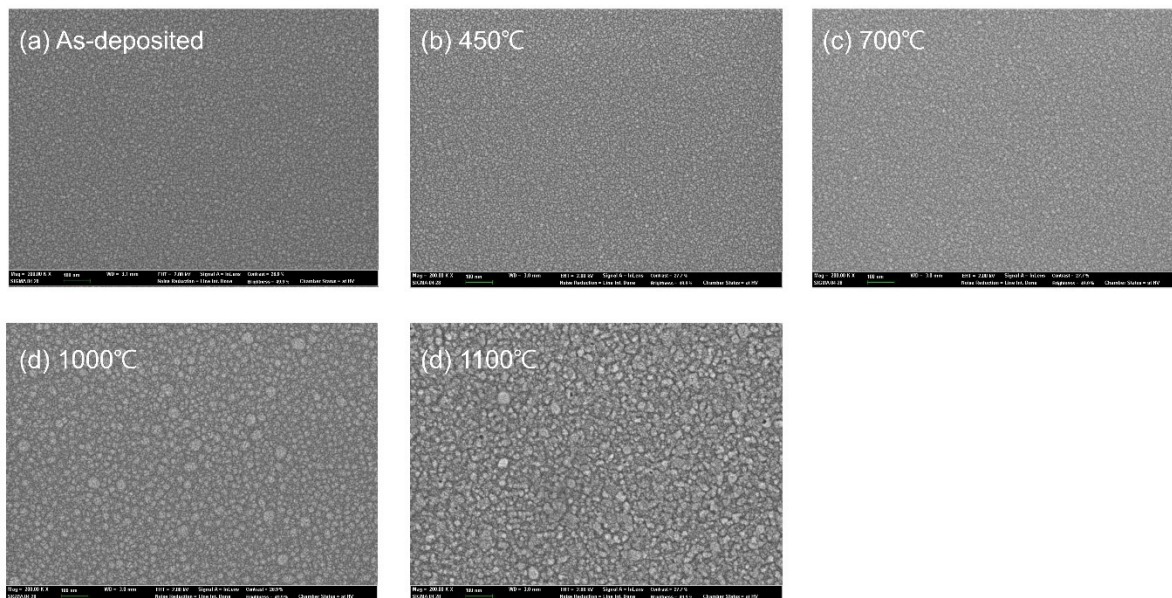

**Figure S3.** Scanning electron microscopy(SEM) image of HfN<sub>x</sub> film annealed under different temperatures. All films were deposited with the precleaning step.

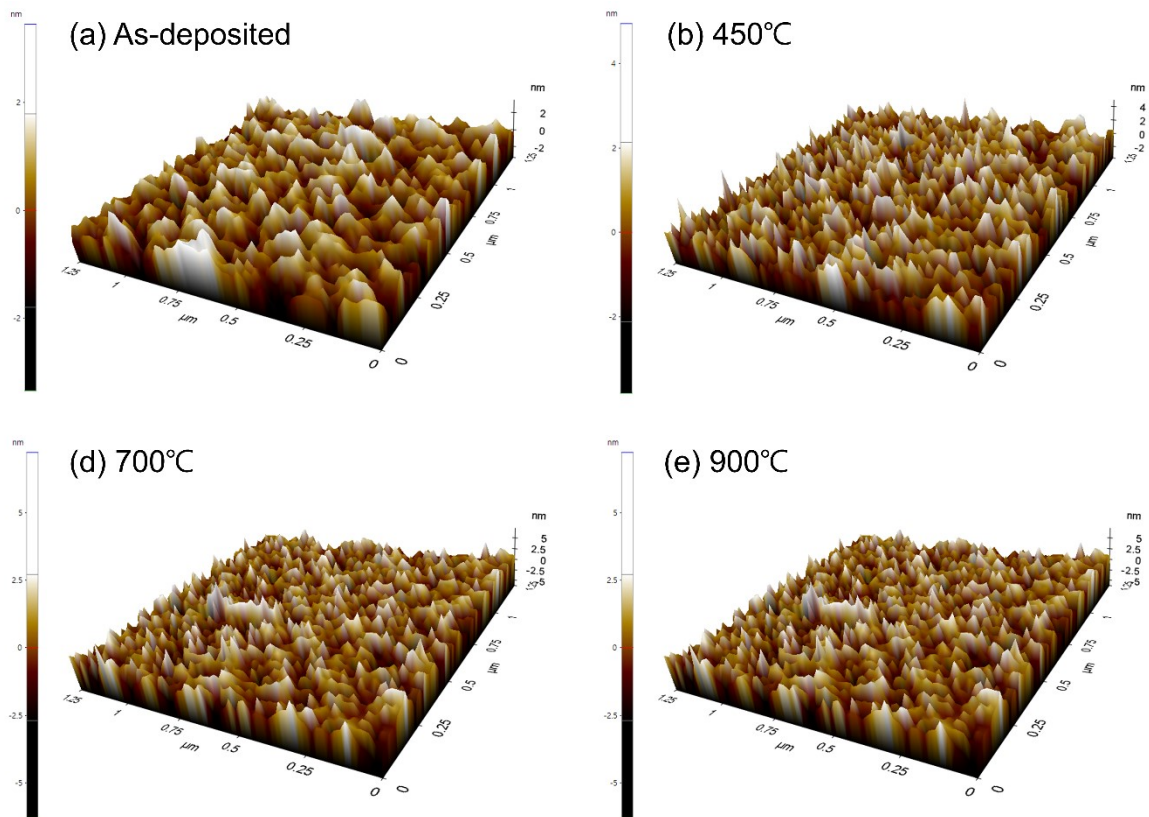

**Figure S4.** The AFM images of  $\text{HfN}_x$  film, annealed under different temperatures. All films were deposited without the precleaning step.

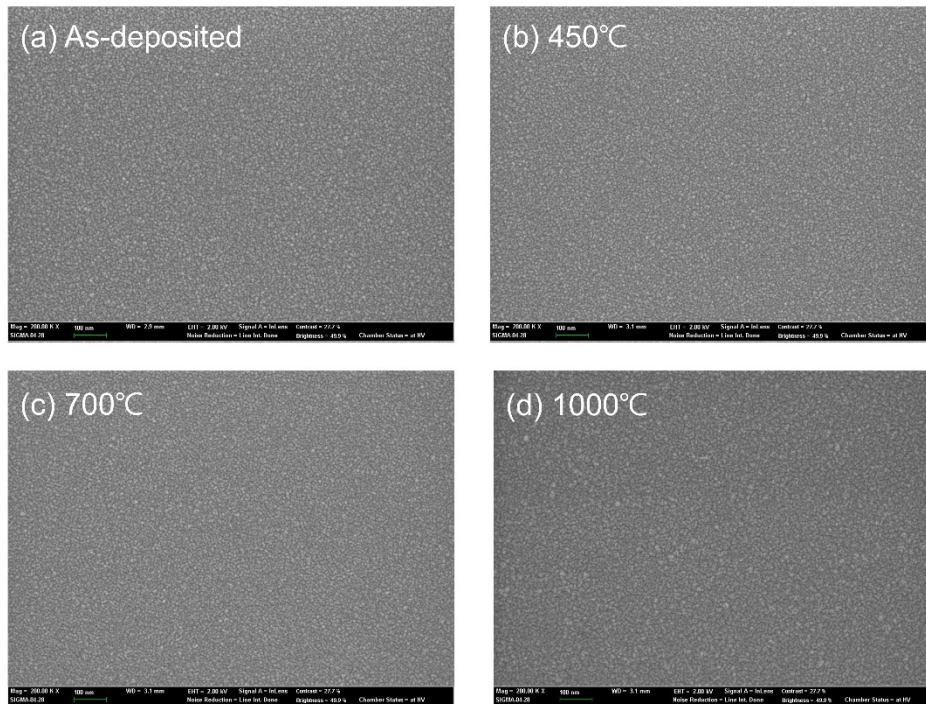

**Figure S5.** SEM image of  $\text{HfN}_x$  film annealed under different temperatures. All films were deposited without the precleaning step.

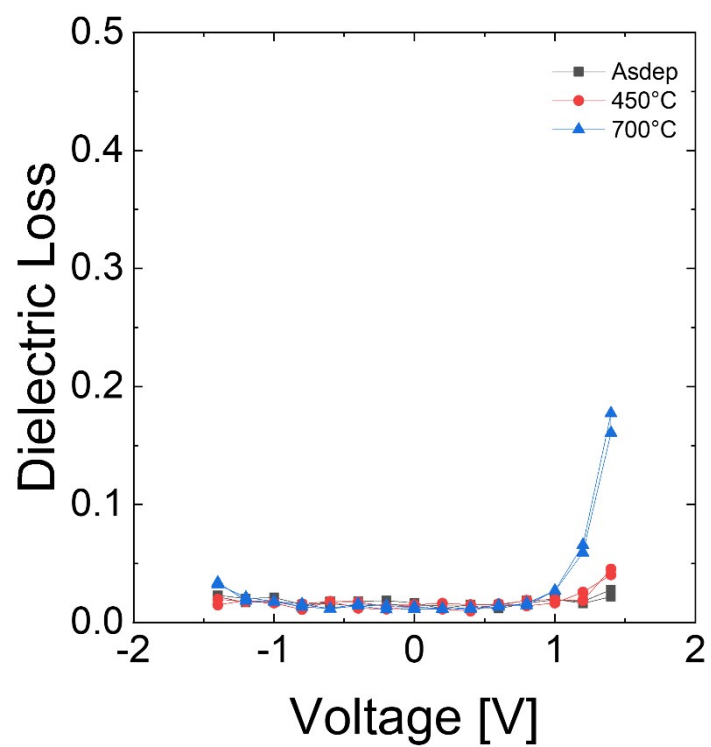

**Figure S6.** Dielectric loss of HfN<sub>x</sub> film annealed under different temperatures.
